# Supplementary material
Source: PubMed Central journal article supplement (PMC4633786)
Supplement: CJN.03140315_CJN03140315SupplementaryData1.pdf [file CJN.03140315_CJN03140315SupplementaryData1.pdf]

## **Affiliation - Online**

Salvatore De Cosmo<sup>1</sup>, Francesca Viazzi<sup>2</sup>, Antonio Pacilli<sup>1</sup>, Carlo Giorda<sup>3</sup>, Antonio Ceriello<sup>4</sup>, Sandro Gentile<sup>5</sup>, Giuseppina Russo<sup>6</sup>, Maria C. Rossi<sup>7</sup>, Antonio Nicolucci<sup>7</sup>, Pietro Guida<sup>8</sup>, Daniel Feig<sup>9</sup>, Richard J. Johnson<sup>10</sup>, Roberto Pontremoli<sup>2</sup>, and the AMD-Annals Study Group

<sup>1</sup>Department of Medical Sciences, Scientific Institute “Casa Sollievo della Sofferenza”, San Giovanni Rotondo (FG), Italy

<sup>2</sup>Università degli Studi and IRCCS Azienda Ospedaliera Universitaria San Martino-IST, Genova, Italy

<sup>3</sup>Diabetes and Metabolism Unit ASL Turin 5 Chieri (TO) Italy

<sup>4</sup>Institut d'Investigacions Biomèdiques August Pii Sunyer (IDIBAPS) and Centro de Investigación Biomédica en Red de Diabetes y Enfermedades Metabólicas Asociadas (CIBERDEM), Barcelona, Spain

<sup>5</sup>Department of Clinical and Experimental Medicine, 2<sup>nd</sup> University of Naples, Italy

<sup>6</sup>Department of Clinical and Experimental Medicine, University of Messina, Messina, Italy

<sup>7</sup>Center for Outcomes Research and Clinical Epidemiology, Pescara, Italy

<sup>8</sup>Associazione Medici Diabetologi, Rome, Italy

<sup>9</sup>Division of Pediatric Nephrology, University of Alabama, Birmingham, AL, USA

<sup>10</sup>Division of Kidney Diseases and Hypertension, University of Colorado Denver, Aurora, CO, USA
